# Supplementary material for: Backdoor Attacks on Deep Neural Networks via Transfer Learning from Natural Images
Source: MDPI journal article supplement (doi:10.3390/app122412564), 2022-12-08
Supplement: s1 [file s1]

Archive with 1 entries (1 files):
- applsci-2033858-supplementary.pdf
